# Supplementary material
Source: MDPI journal article supplement (https://www.mdpi.com/2072-4292/15/5/1170)

Supplementary material

# Automatic Segmentation of Water Bodies Using RGB Data: A Physically-Based approach

Matías García, Hernán Alcayaga and Alonso Pizarro \*

Escuela de Ingeniería en Obras Civiles, Universidad Diego Portales, Av. Ejército 441, Santiago 8370109, Chile

\* Correspondence: [alonso.pizarro@mail.udp.cl](mailto:alonso.pizarro@mail.udp.cl)

**Supplementary Material A** – WATER modelling overview with required and optional inputs as well outputs.

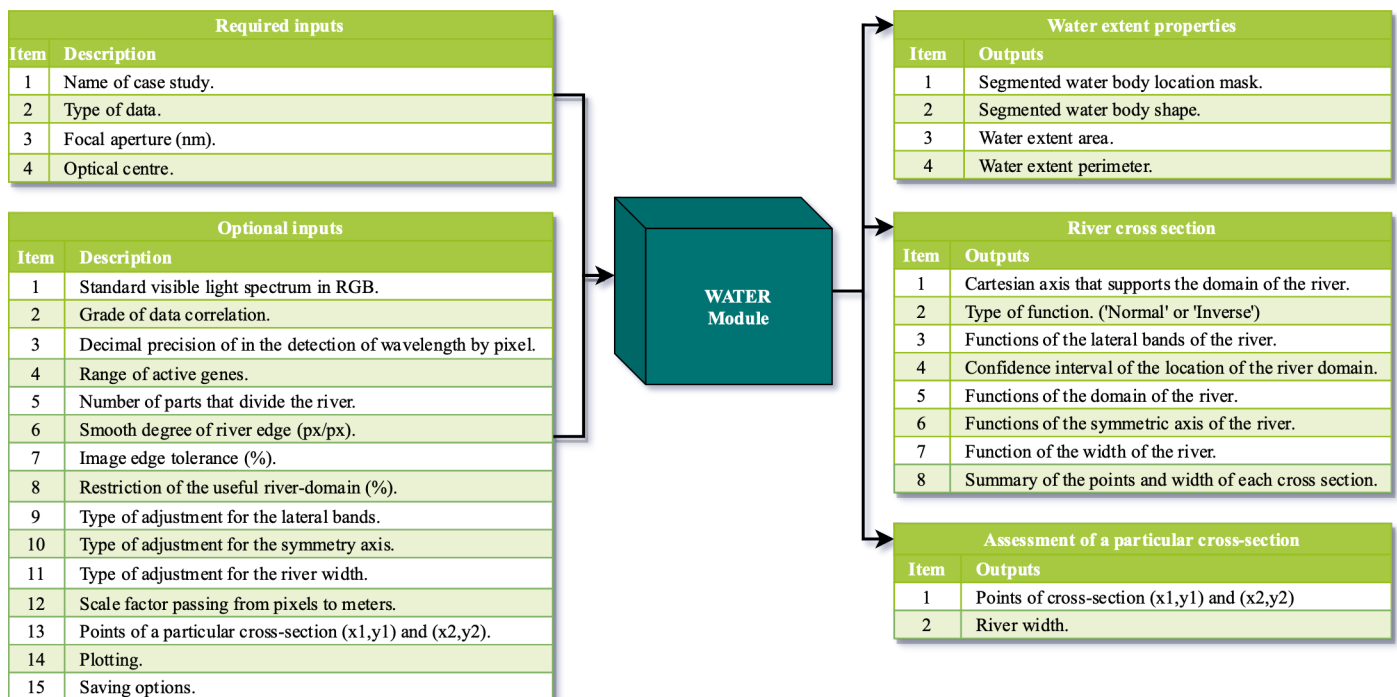

## Supplementary Material B – WATER modelling framework

### Performance of RGB sensor:

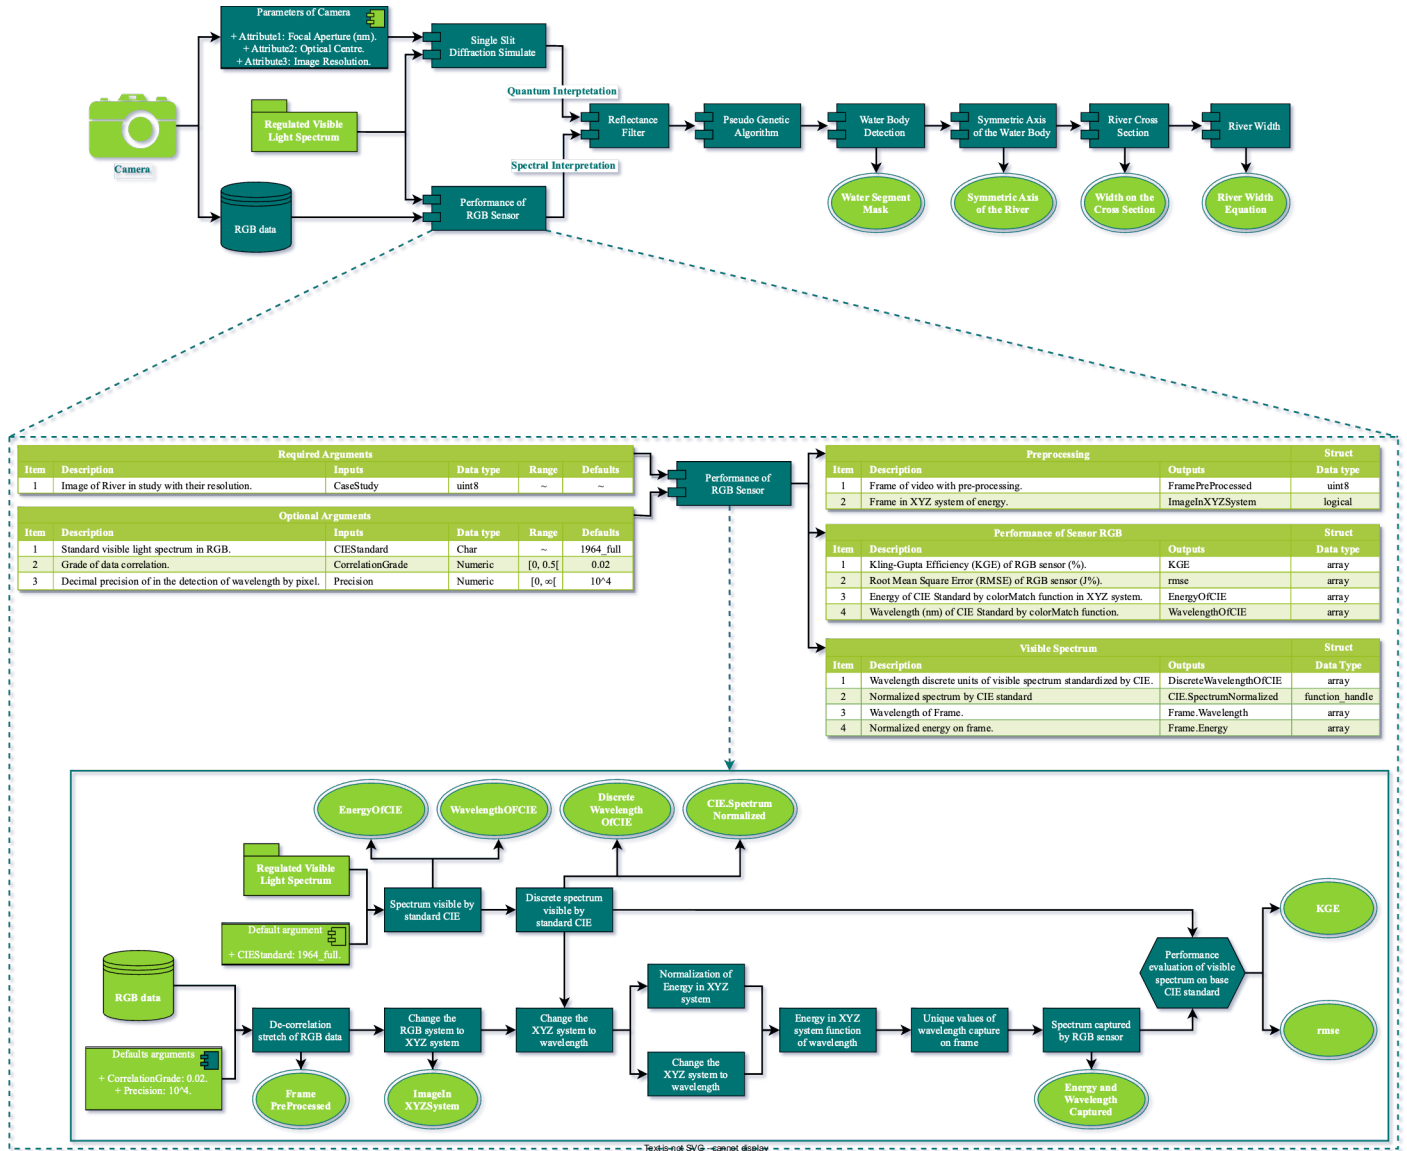



## Simulation of Single Slit Diffraction:

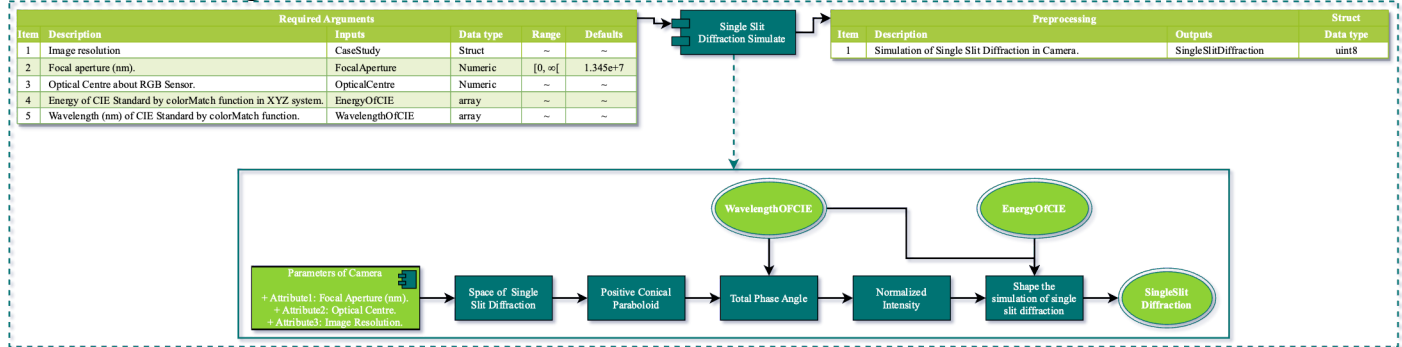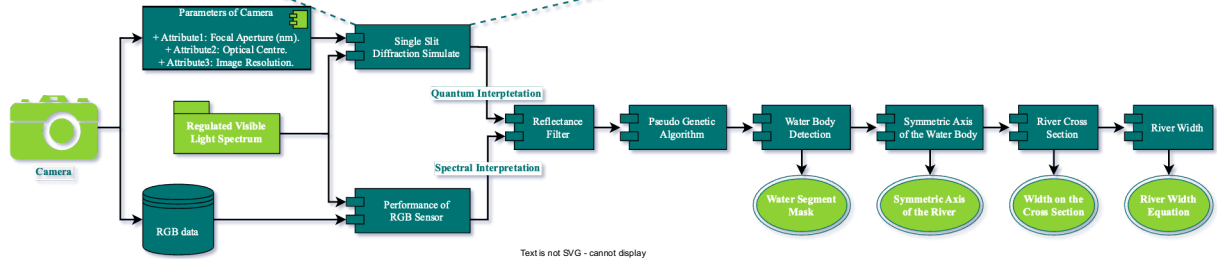

## Reflectance filter:

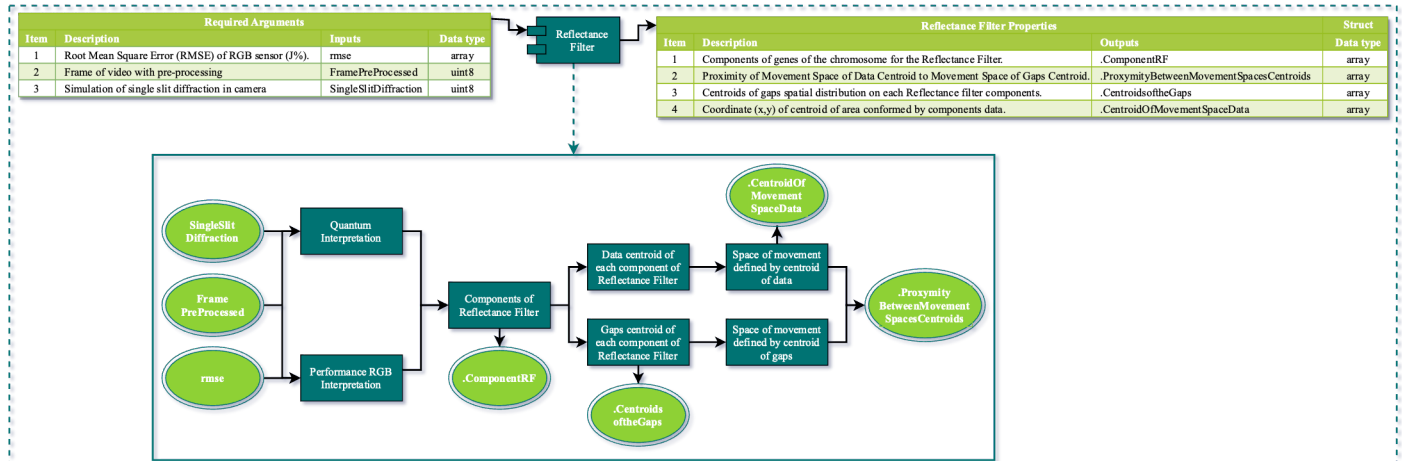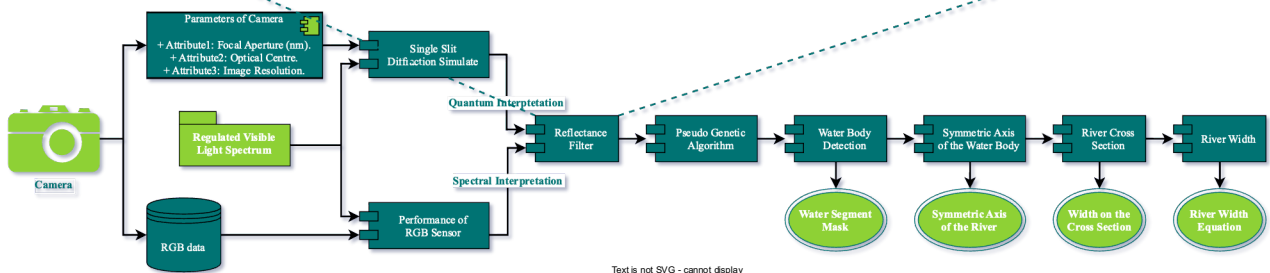

## Pseudo genetic algorithm:

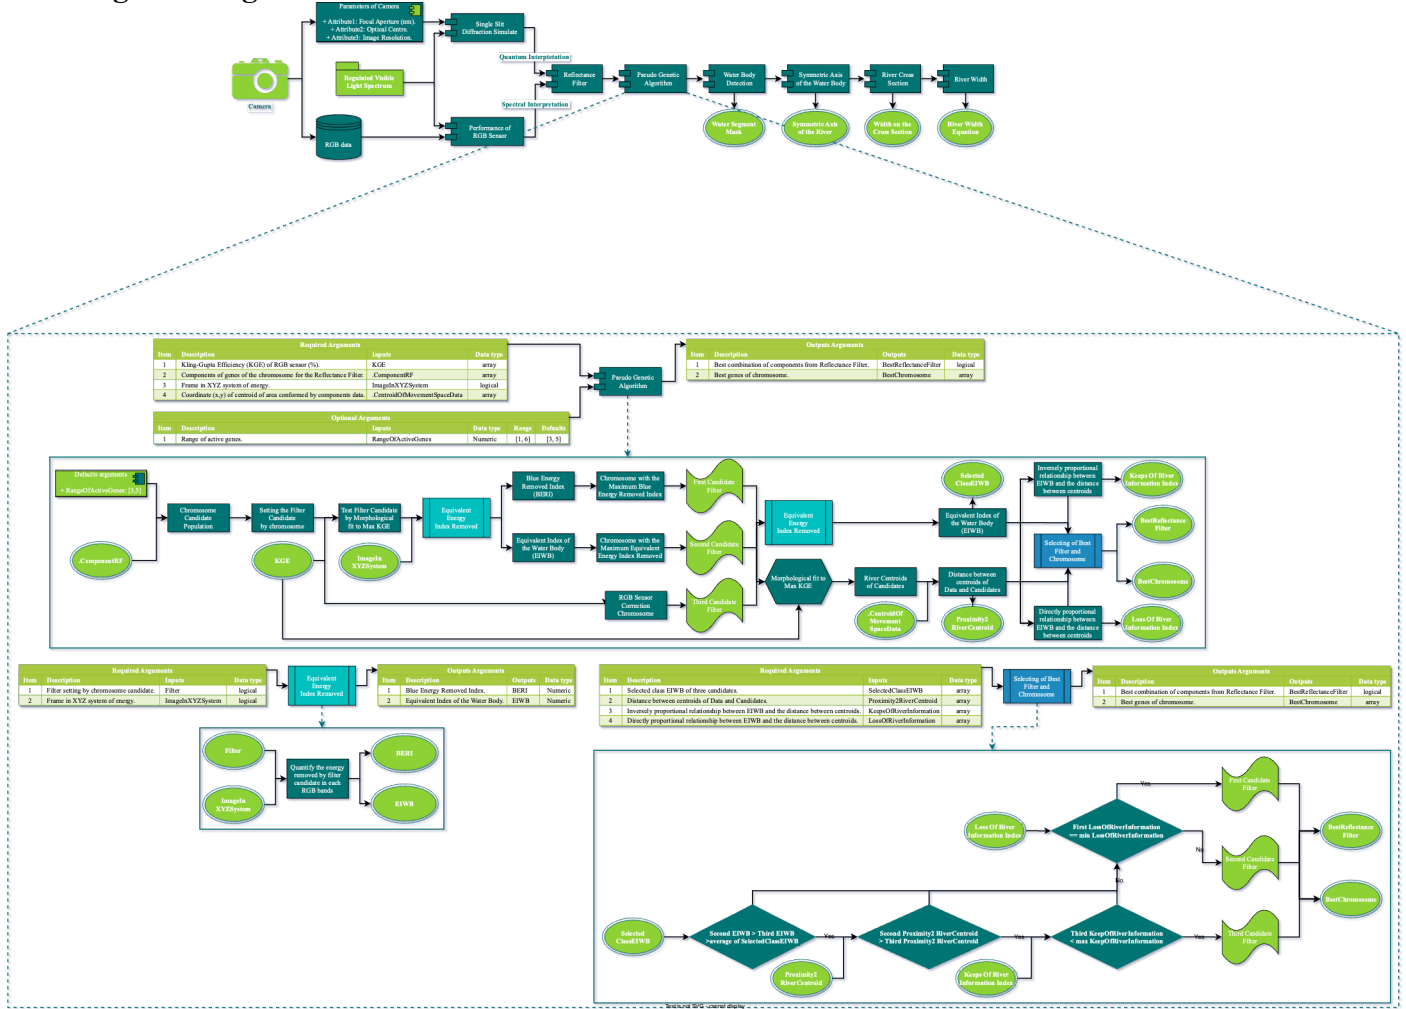

## Water body detection:

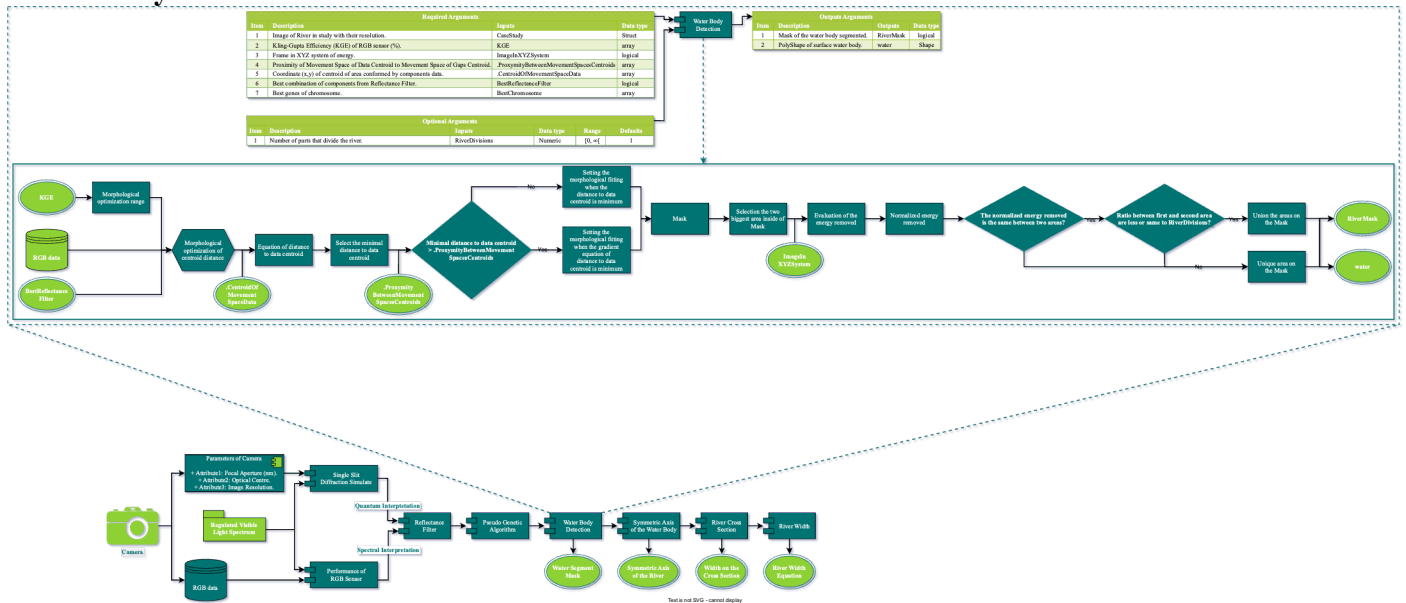

River symmetry axis:

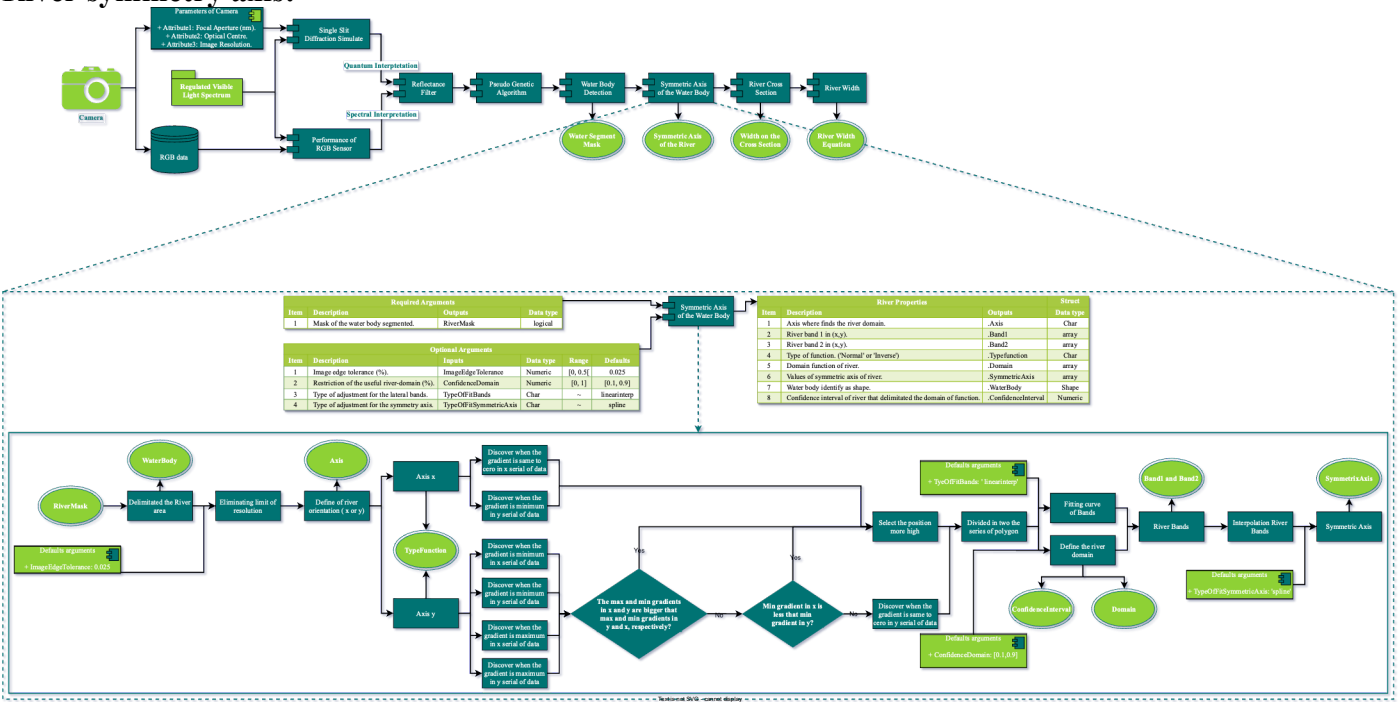

## River cross section:

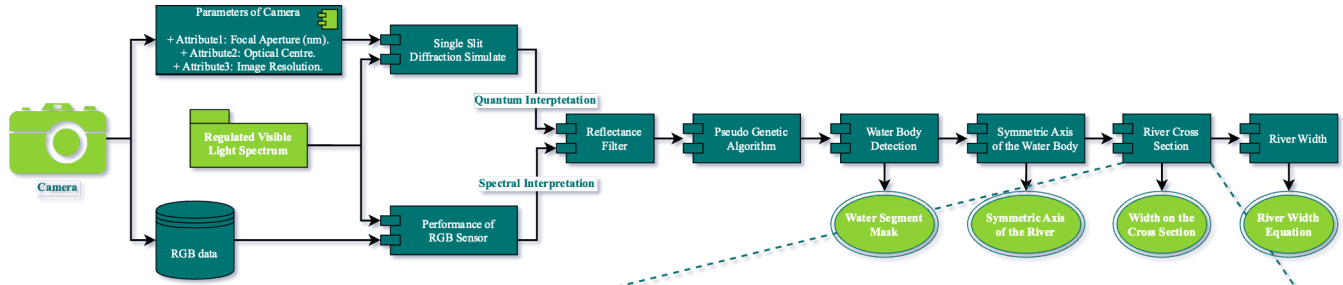

| Required Arguments |                                    |                | Struct    |
|--------------------|------------------------------------|----------------|-----------|
| Item               | Description                        | Outputs        | Data type |
| 1                  | Axis where finds the river domain. | .Axis          | Char      |
| 2                  | Domain function of river.          | .Domain        | array     |
| 3                  | Values of symmetric axis of river. | .SymmetricAxis | array     |
| 4                  | Water body identify as shape.      | .WaterBody     | Shape     |

| Optional Arguments |                                                               |        |           |          |          |
|--------------------|---------------------------------------------------------------|--------|-----------|----------|----------|
| Item               | Description                                                   | Inputs | Data type | Range    | Defaults |
| 1                  | Location of domain where you can measurement the river width. | Zone   | Numeric   | [0, 0.5[ | 0.025    |
| 2                  | Scale factor from pixel to meter.                             | Px     | Numeric   | [0, ∞[   | 1        |
| 3                  | Point 1 a particular cross-section (x1,y1).                   | Point1 | Numeric   | ~        | ([1,1])  |
| 4                  | Point 2 a particular cross-section (x2,y2).                   | Point2 | Numeric   | ~        | ([1,1])  |

| Outputs Arguments |                                             |            | Data type |
|-------------------|---------------------------------------------|------------|-----------|
| Item              | Description                                 | Outputs    | Data type |
| 1                 | Point one of cross section in px.           | Point1     | Numeric   |
| 2                 | Point two of cross section in px.           | Point2     | Numeric   |
| 3                 | River width in the cross section in meters. | riverwidth | Numeric   |

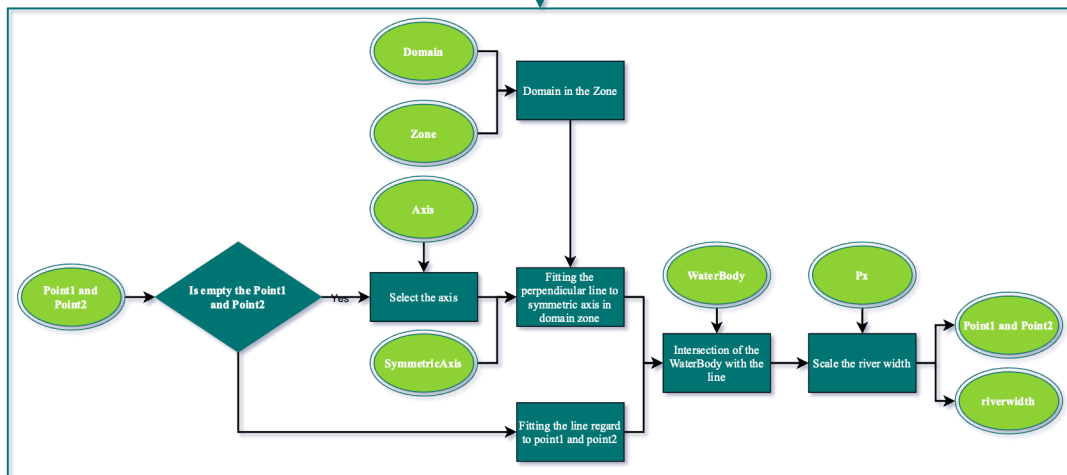

Text is not-SVG= cannot display

River width:

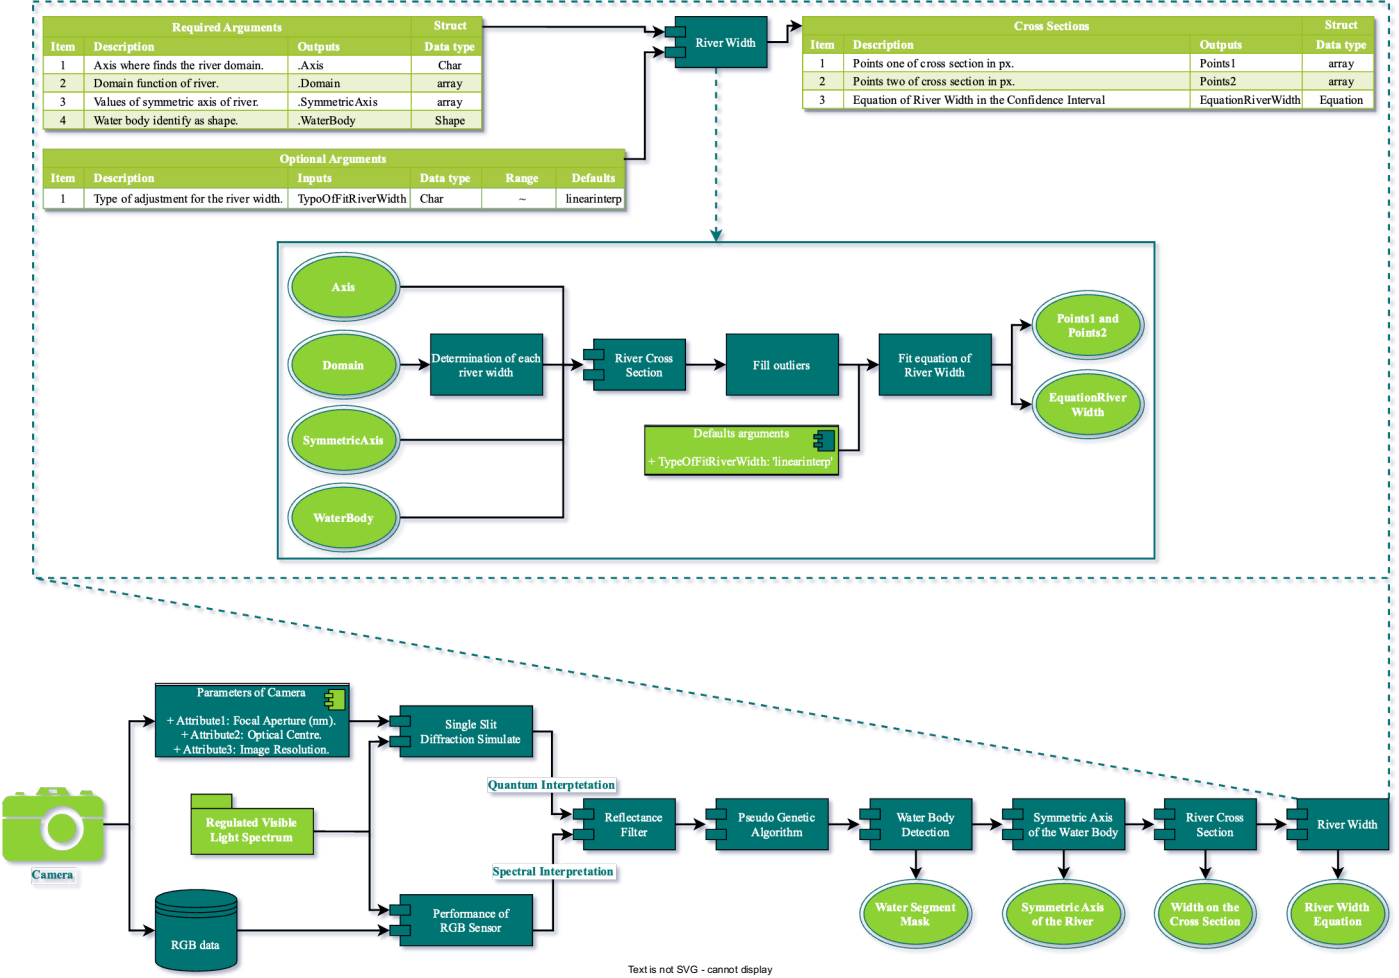

## Supplementary Material C – Case studies information and performance of WATER

Data partially obtained from the [supporting files](#) of **Bandini et al. (2021)** “*A drone-borne method to jointly estimate discharge and Manning’s roughness of natural streams*”. Water Resources Research, 57(2), e2020WR028266.

| Characteristics and Properties of the rivers |                      |                             |                 |           |           |              | Area (m <sup>2</sup> ) |        |         | Perimeter (m) |        |         |
|----------------------------------------------|----------------------|-----------------------------|-----------------|-----------|-----------|--------------|------------------------|--------|---------|---------------|--------|---------|
| ID                                           | Stream Name          | Aquatic Vegetation          | Discharge (l/s) | Slope (-) | Width (m) | Px (m/pixel) | WATER                  | Manual | Error   | WATER         | Manual | Error   |
| 1                                            | Egtved Å XS1         | High density vegetation     | 923             | 0.00160   | 6.75      | 0.00590      | 49.37                  | 49.86  | -1.00%  | 36            | 46     | -20.40% |
| 2                                            | Egtved Å XS3         | High density vegetation     | 822             | 0.00192   | 5.00      | 0.00540      | 50.6                   | 54.15  | -6.60%  | 43            | 54     | -20.00% |
| 3                                            | Egtved Å XS4         | No vegetation, clean bottom | 766             | 0.00120   | 6.50      | 0.00421      | 40.34                  | 38.61  | 4.50%   | 42            | 58     | -27.10% |
| 4                                            | Egtved Å XS2         | High density vegetation     | 784             | 0.00069   | 7.95      | 0.00570      | 120.48                 | 117.5  | 2.50%   | 70            | 78     | -9.60%  |
| 5                                            | Grindsted Å ST10     | Vegetation patches          | 2169            | 0.00128   | 8.70      | 0.00590      | 130.67                 | 140.15 | -6.80%  | 70            | 74     | -4.20%  |
| 6                                            | Grindsted Å ST8      | Vegetation patches          | 2186            | 0.00082   | 6.10      | 0.00501      | 79.33                  | 77.98  | 1.70%   | 63            | 61     | 4.10%   |
| 7                                            | Grindsted Å ST310358 | Vegetation patches          | 1655            | 0.00128   | 7.90      | 0.00634      | 130.36                 | 129.06 | 1.00%   | 68            | 86     | -20.20% |
| 8                                            | Grindsted Å ST1      | Vegetation patches          | 1592            | 0.00032   | 8.45      | 0.00550      | 96.69                  | 82.71  | 16.90%  | 72            | 82     | -12.70% |
| 9                                            | Grindsted Å ST12     | Vegetation patches          | 2482            | 0.00112   | 10.20     | 0.00678      | 163.92                 | 167.01 | -1.90%  | 64            | 74     | -13.60% |
| 10                                           | Grindsted Å ST14     | Vegetation patches          | 3640            | 0.00133   | 11.40     | 0.00841      | 202.37                 | 182.83 | 10.70%  | 108           | 111    | -3.10%  |
| 11                                           | Grindsted Å ST310357 | Vegetation patches          | 1866            | 0.00027   | 6.50      | 0.00570      | 86.95                  | 87.47  | -0.60%  | 83            | 71     | 16.70%  |
| 12                                           | Grindsted Å ST6      | Vegetation patches          | 1774            | 0.00093   | 7.30      | 0.00647      | 144.88                 | 143.08 | 1.30%   | 75            | 96     | -21.60% |
| 13                                           | Grindsted Å ST7      | Vegetation patches          | 2182            | 0.00099   | 7.00      | 0.00674      | 128.86                 | 135.52 | -4.90%  | 82            | 97     | -14.90% |
| 14                                           | Grindsted Å ST9      | Vegetation patches          | 2543            | 0.00089   | 8.80      | 0.00498      | 93.55                  | 92.96  | 0.60%   | 63            | 61     | 3.00%   |
| 15                                           | Usserød Bridge       | No vegetation, clean bottom | 877             | 0.00049   | 6.20      | 0.00566      | 55.69                  | 53.59  | 3.90%   | 39            | 45     | -13.40% |
| 16                                           | Usserød Å Factory    | No vegetation, clean bottom | 841             | 0.00210   | 6.15      | 0.00406      | 45.96                  | 48.09  | -4.40%  | 30            | 38     | -20.80% |
| 17                                           | Usserød Å ST9        | No vegetation, clean bottom | 999             | 0.00110   | 3.86      | 0.00705      | 131.19                 | 92.12  | 42.40%  | 115           | 86     | 34.80%  |
| 18                                           | Usserød Å ST7        | No vegetation, clean bottom | 499             | 0.00210   | 3.60      | 0.00428      | 47.48                  | 55.89  | -15.00% | 54            | 53     | 2.80%   |

|         |                      |                             |      |         |       |         |        |        |         |     |     |         |
|---------|----------------------|-----------------------------|------|---------|-------|---------|--------|--------|---------|-----|-----|---------|
| 19      | Usserød Å ST8        | No vegetation, clean bottom | 463  | 0.00056 | 4.80  | 0.00668 | 133.01 | 130.95 | 1.60%   | 77  | 76  | 1.40%   |
| 20      | Vejle Å Ving. XS2    | Vegetation patches          | 2246 | 0.00150 | 16.82 | 0.01140 | 563.26 | 545.42 | 3.30%   | 157 | 166 | -5.80%  |
| 21      | Vejle Å Ving. XS1    | High density vegetation     | 3053 | 0.00070 | 17.80 | 0.00521 | 132.73 | 104.81 | 26.60%  | 86  | 89  | -2.60%  |
| 22      | Vejle Å XS3          | High density vegetation     | 2423 | 0.00240 | 19.17 | 0.01080 | 456.72 | 474.06 | -3.70%  | 175 | 183 | -4.30%  |
| 23      | Vejle Å XS1          | High density vegetation     | 860  | 0.00079 | 7.00  | 0.00490 | 76.88  | 75.74  | 1.50%   | 57  | 77  | -25.60% |
| 24      | Vejle Å XS2          | High density vegetation     | 1145 | 0.00024 | 14.96 | 0.00840 | 236.94 | 250.94 | -5.60%  | 103 | 126 | -17.70% |
| 25      | Værebros Å Veksø bro | No vegetation, clean bottom | 180  | 0.00058 | 3.25  | 0.00610 | 77.61  | 61.69  | 25.80%  | 72  | 68  | 6.40%   |
| 26      | Åmose Å XS1          | No vegetation, clean bottom | 81   | 0.00025 | 3.50  | 0.00423 | 47.19  | 45.47  | 3.80%   | 43  | 44  | -2.50%  |
| 27      | Åmose Å XS2          | No vegetation, clean bottom | 830  | 0.00100 | 4.40  | 0.00543 | 122.45 | 124.34 | -1.50%  | 79  | 64  | 23.30%  |
| Average |                      |                             | 1477 | 0.00105 | 8.15  | 0.00619 | 135.02 | 131.93 | 3.56%   | 75  | 80  | -6.21%  |
| Max     |                      |                             | 3640 | 0.00240 | 19.17 | 0.01140 | 563.26 | 545.42 | 42.40%  | 175 | 183 | 34.80%  |
| Min     |                      |                             | 81   | 0.00024 | 3.25  | 0.00406 | 40.34  | 38.61  | -15.00% | 30  | 38  | -27.10% |

# Supplementary Material D – Quantum interference for single slit diffraction

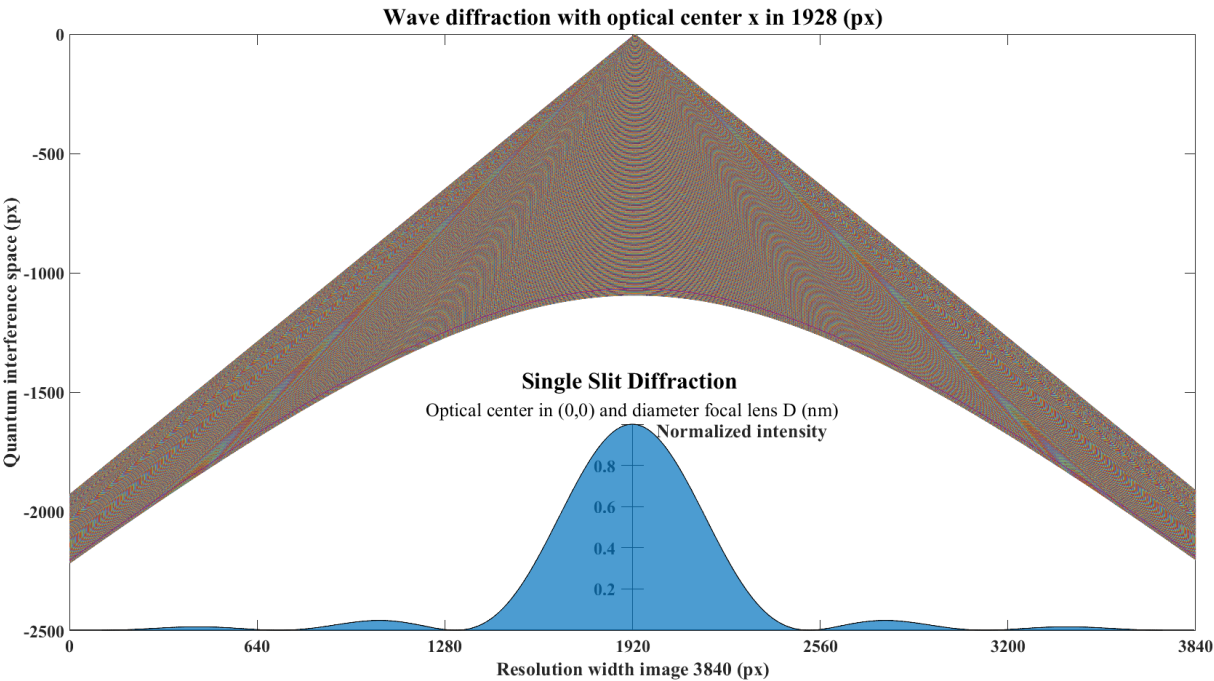



## Supplementary Material E – Contrasting human versus machine performance

**ID: 1 - Stream Egtved Å X S1**

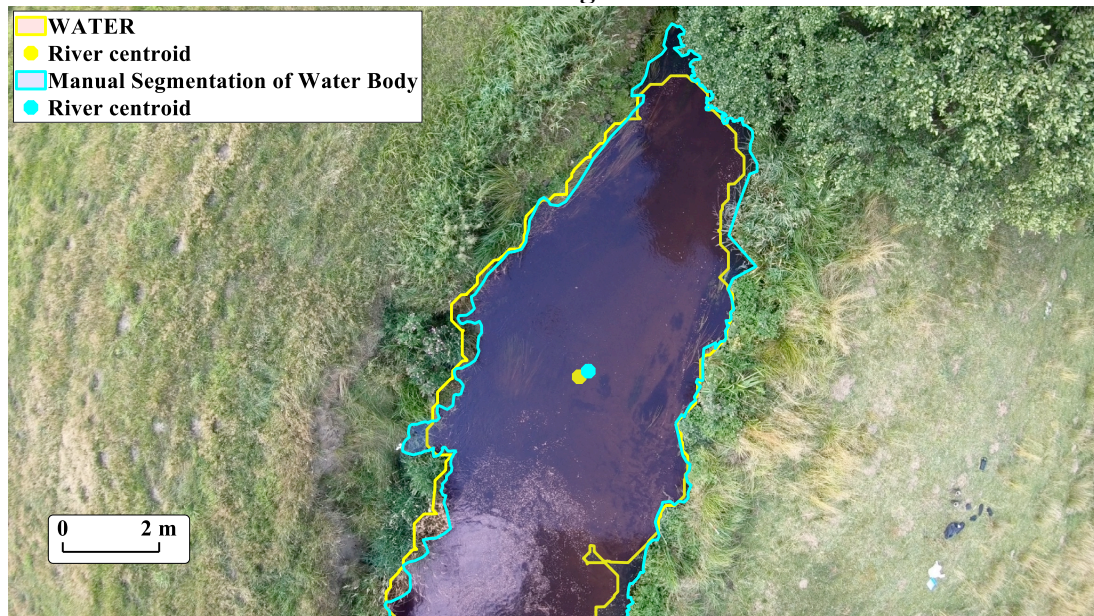

**ID: 2 - Stream Egtved Å X S3**

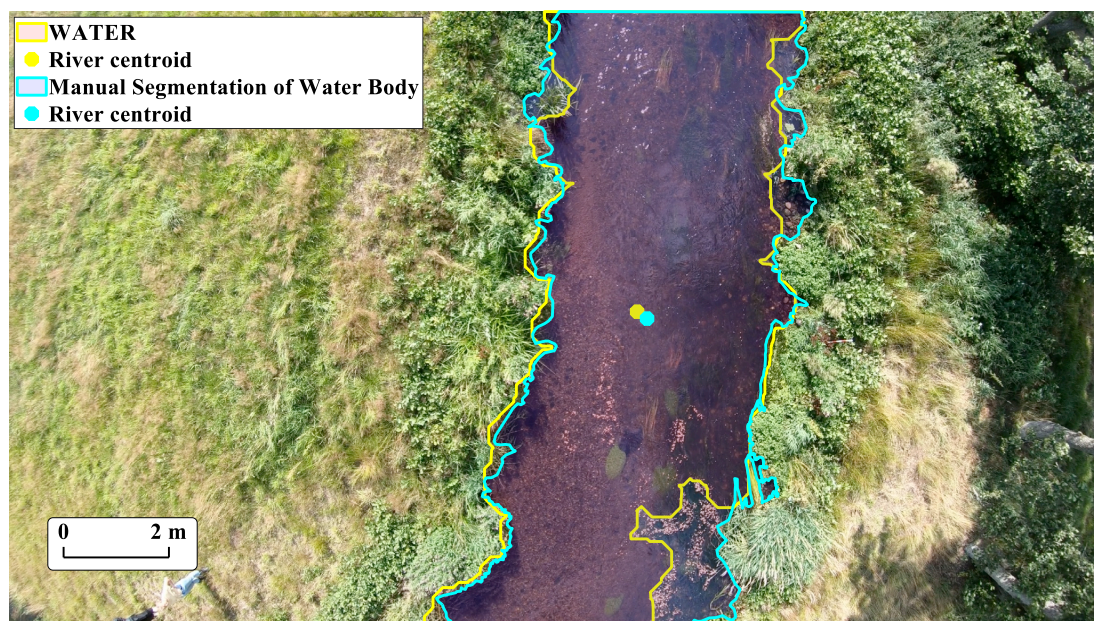



**ID: 3 - Stream Egtved Å X S4**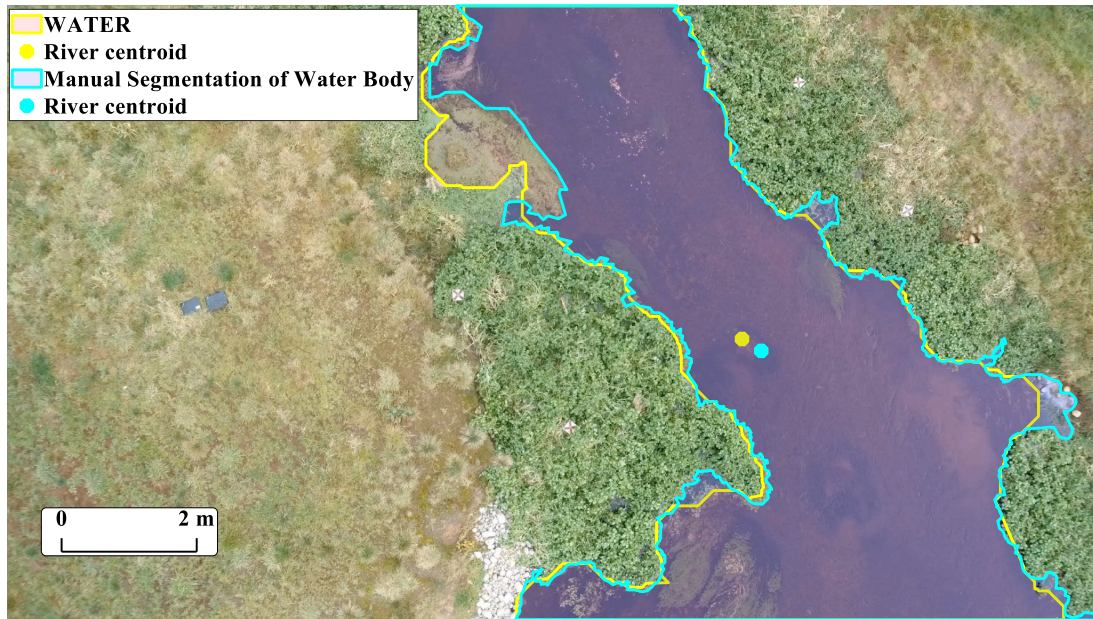**ID: 4 - Stream Egtved Å X S2**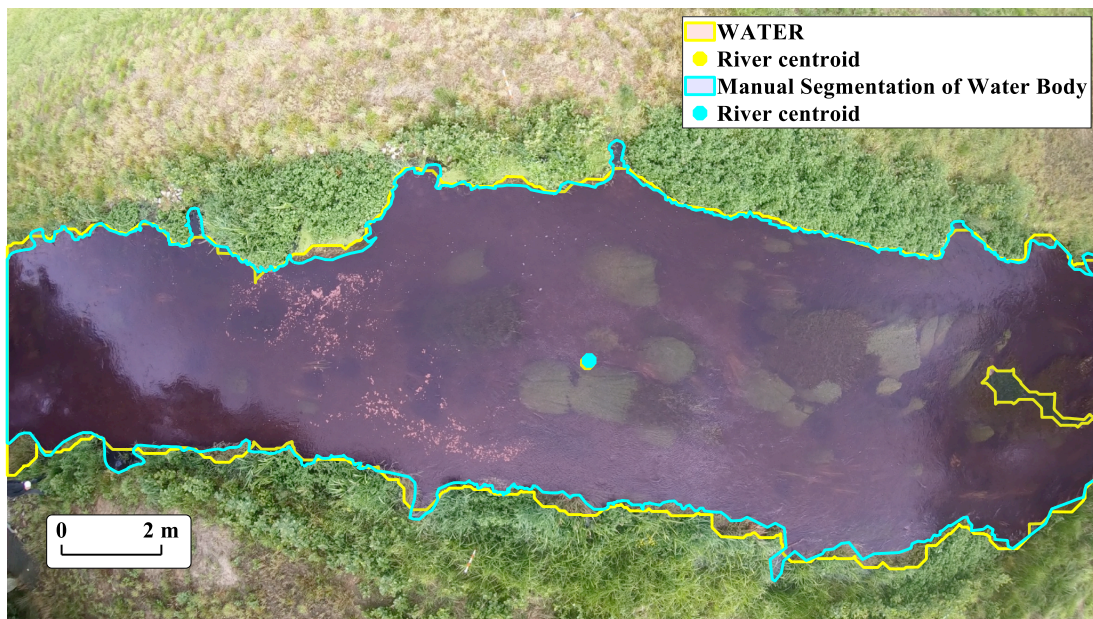



**ID: 5 - Stream Grindsted Å ST10**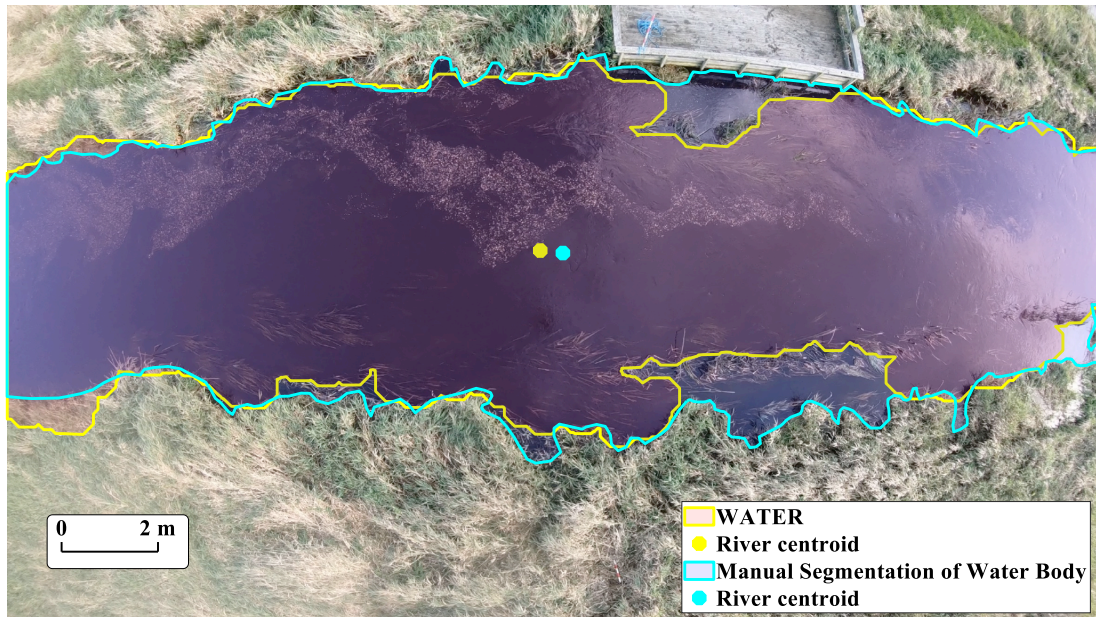**ID: 6 - Stream Grindsted Å ST8**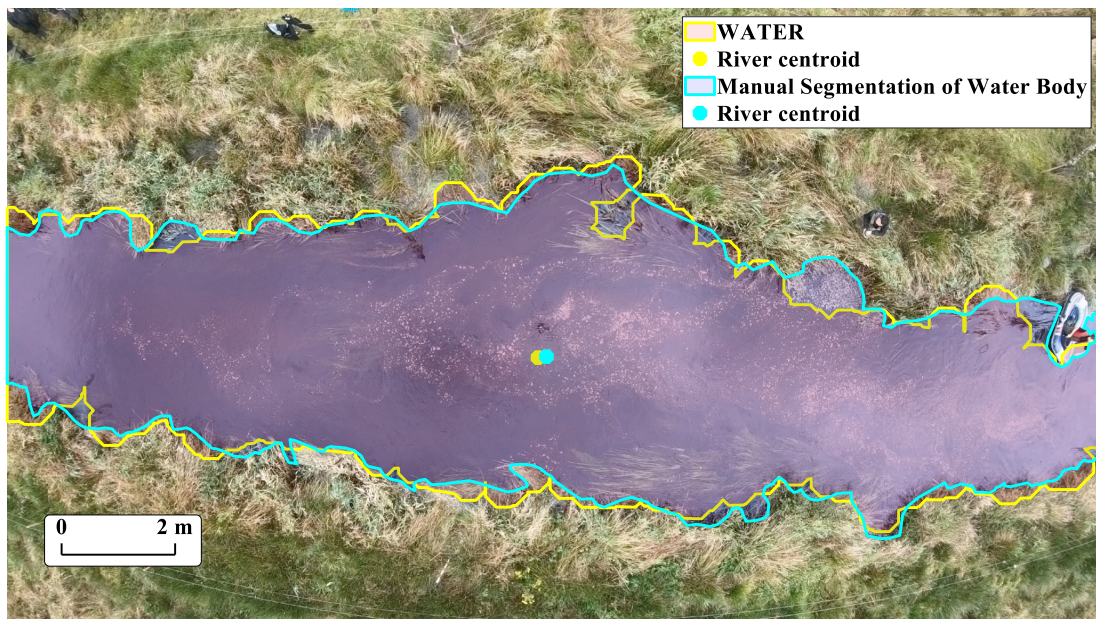



**ID: 7 - Stream Grindsted Å ST310358**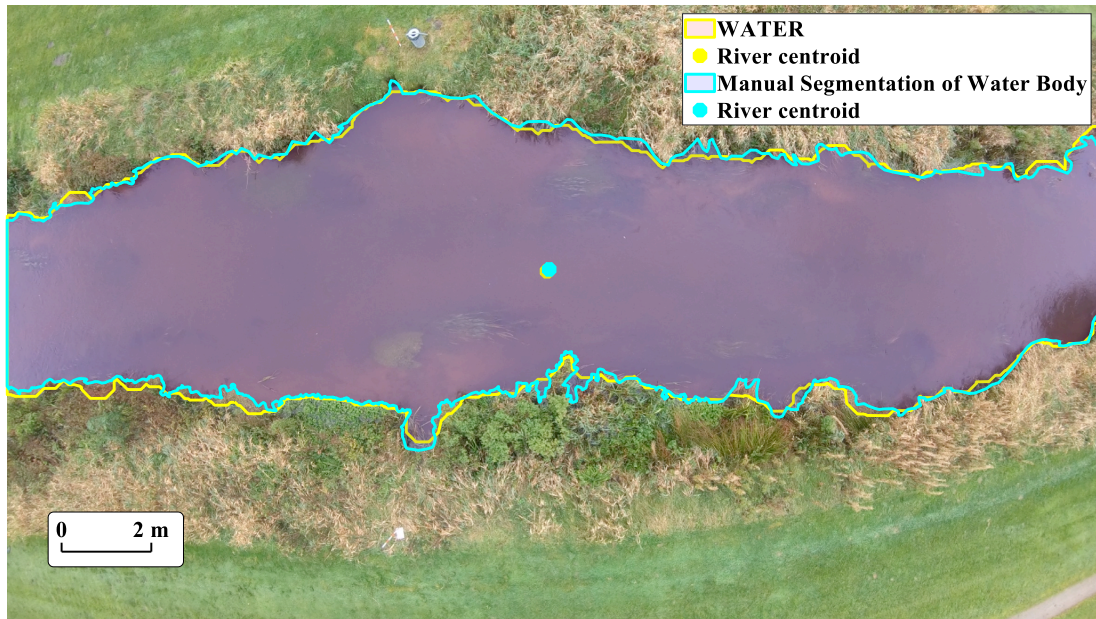**ID: 8 - Stream Grindsted Å ST1**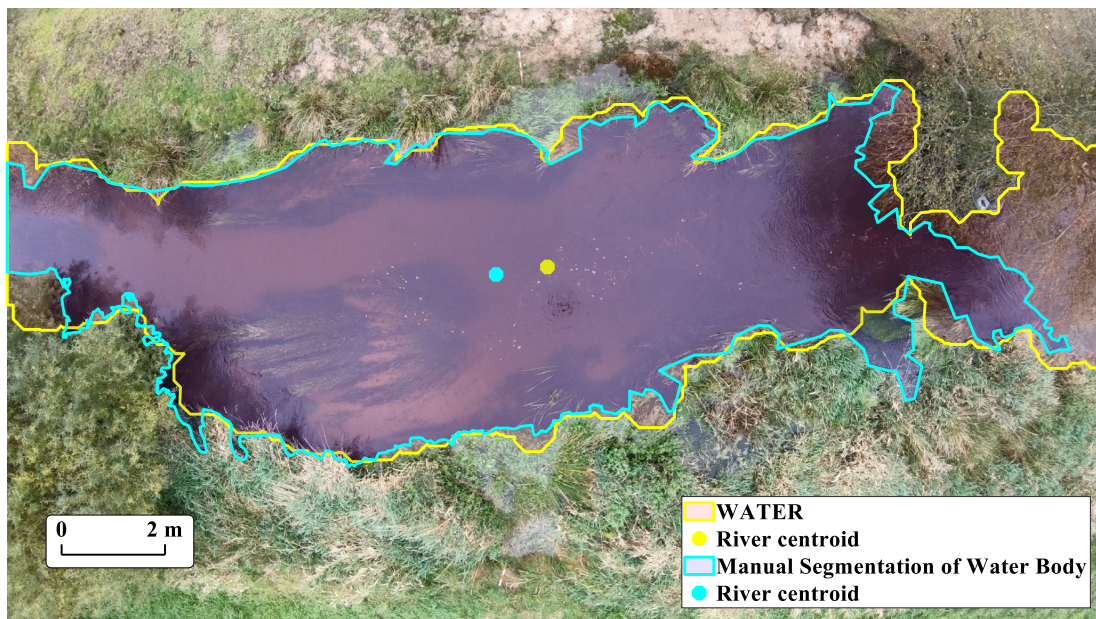



**ID: 9 - Stream Grindsted Å ST12**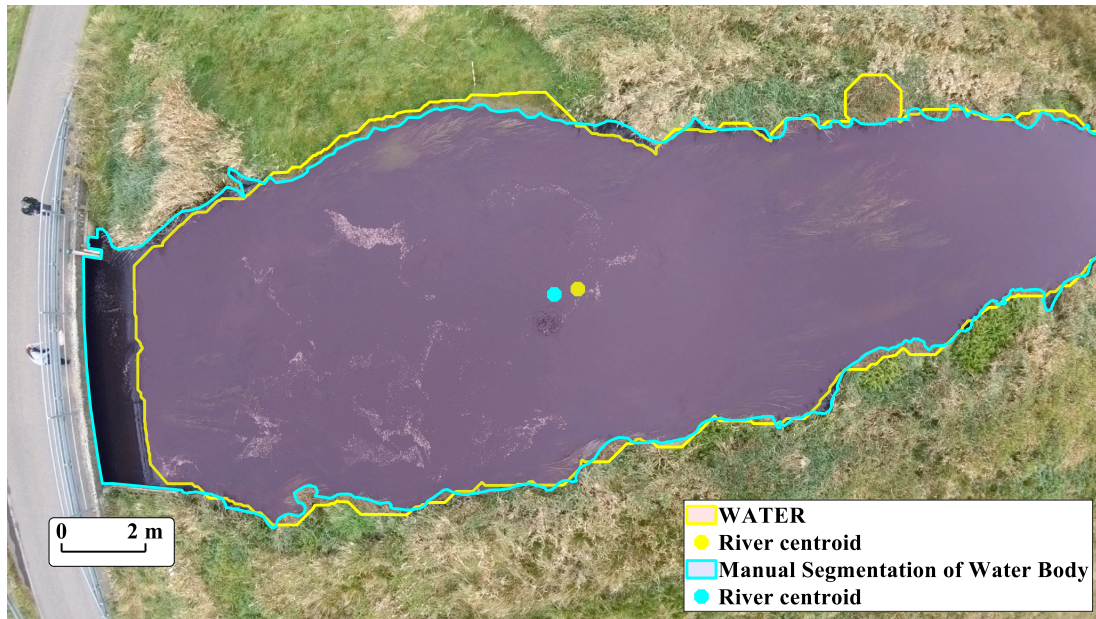**ID: 10 - Stream Grindsted Å ST14**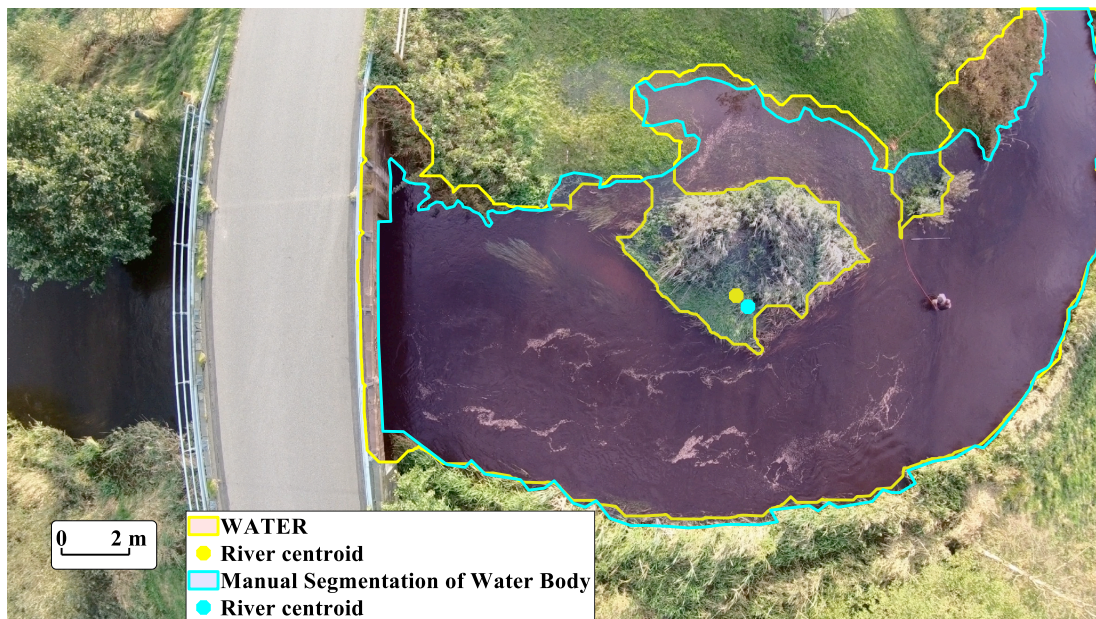



**ID: 11 - Stream Grindsted Å ST310357**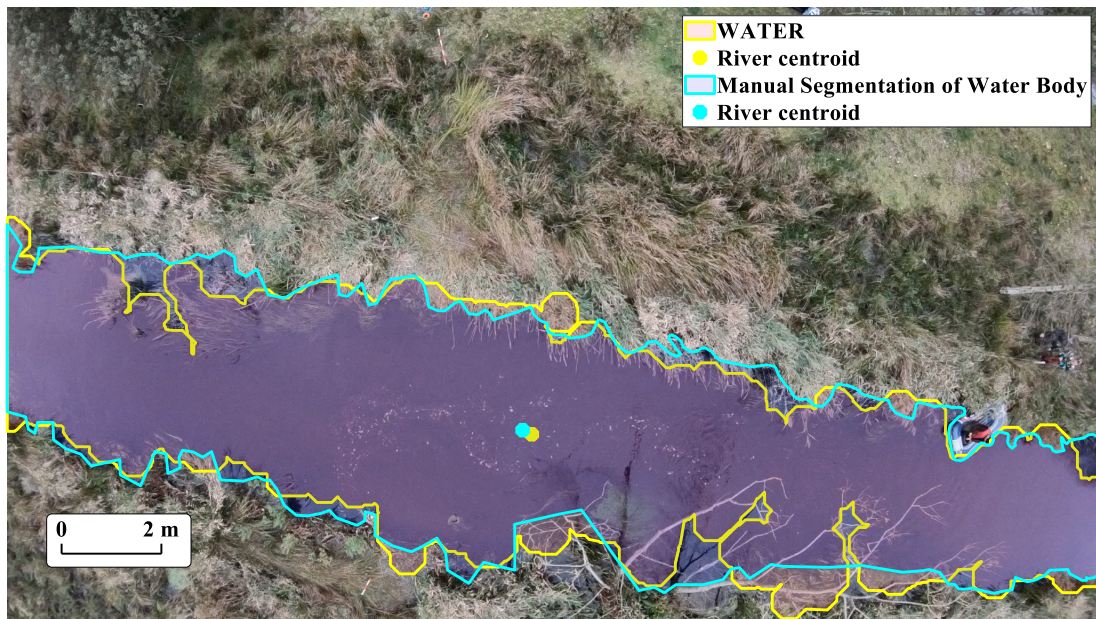**ID: 12 - Stream Grindsted Å ST6**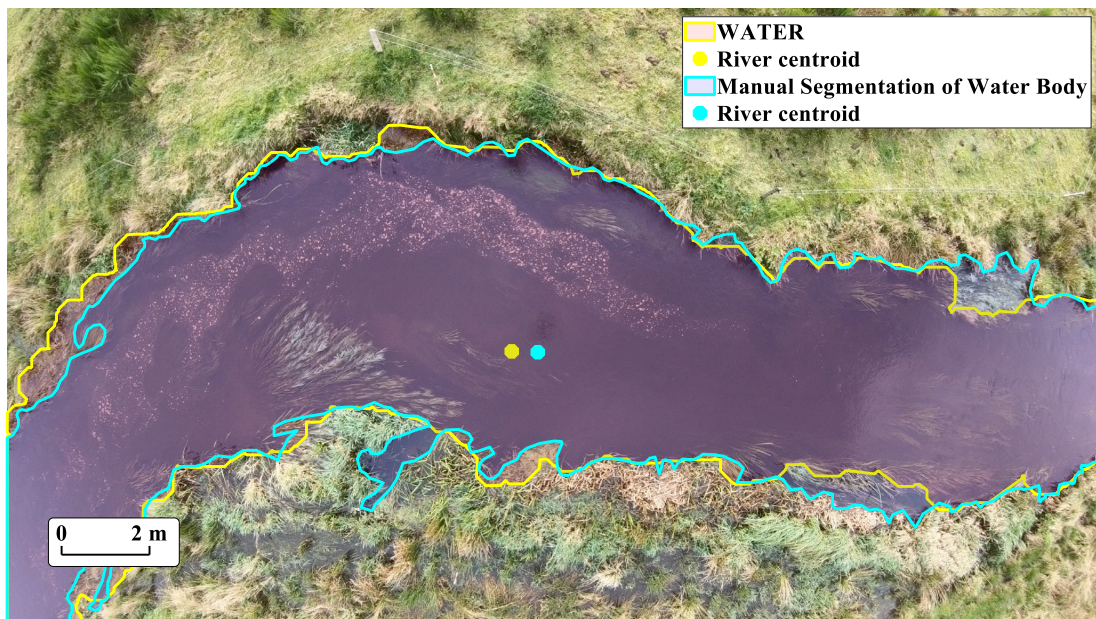



**ID: 13 - Stream Grindsted Å ST7**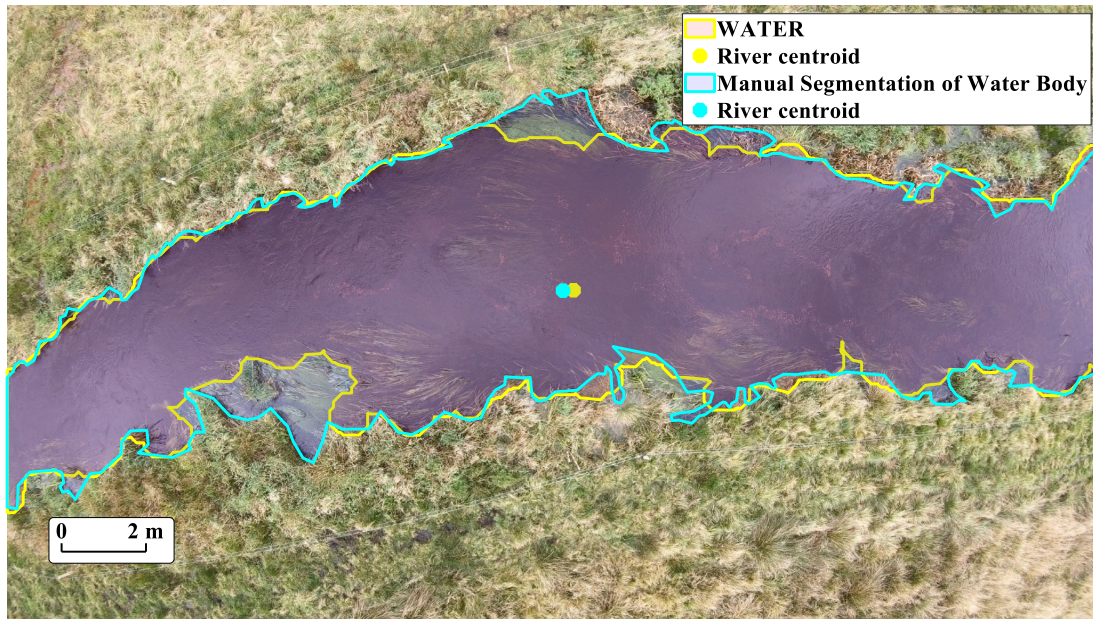**ID: 14 - Stream Grindsted Å ST9**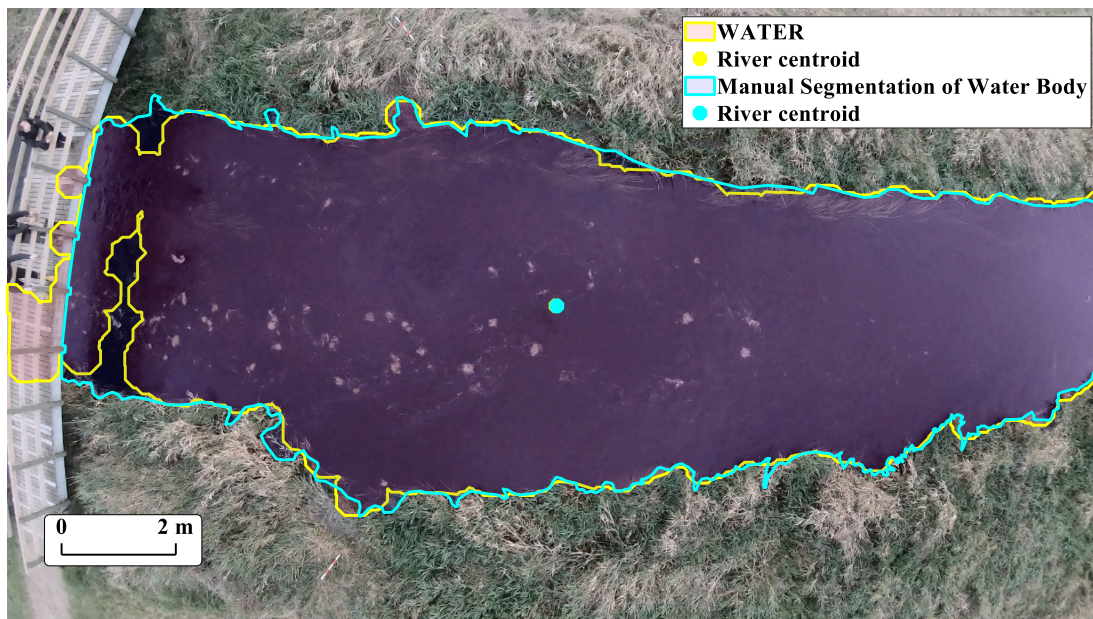



**ID: 15 - Stream Usserød Å Bridge**

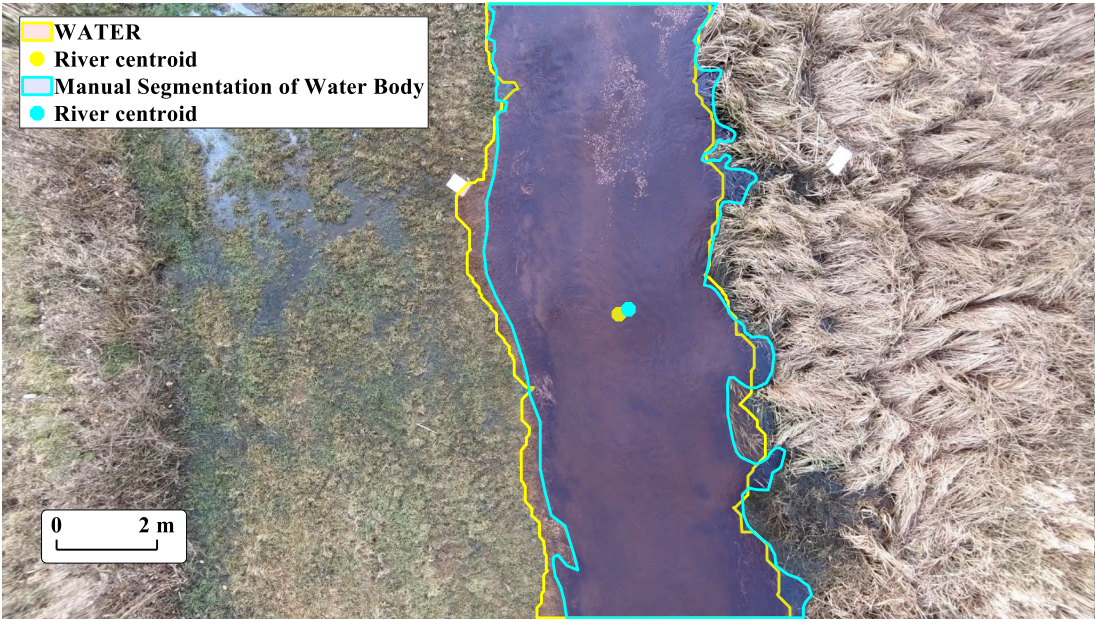

**ID: 16 - Stream Usserød Å Factory**

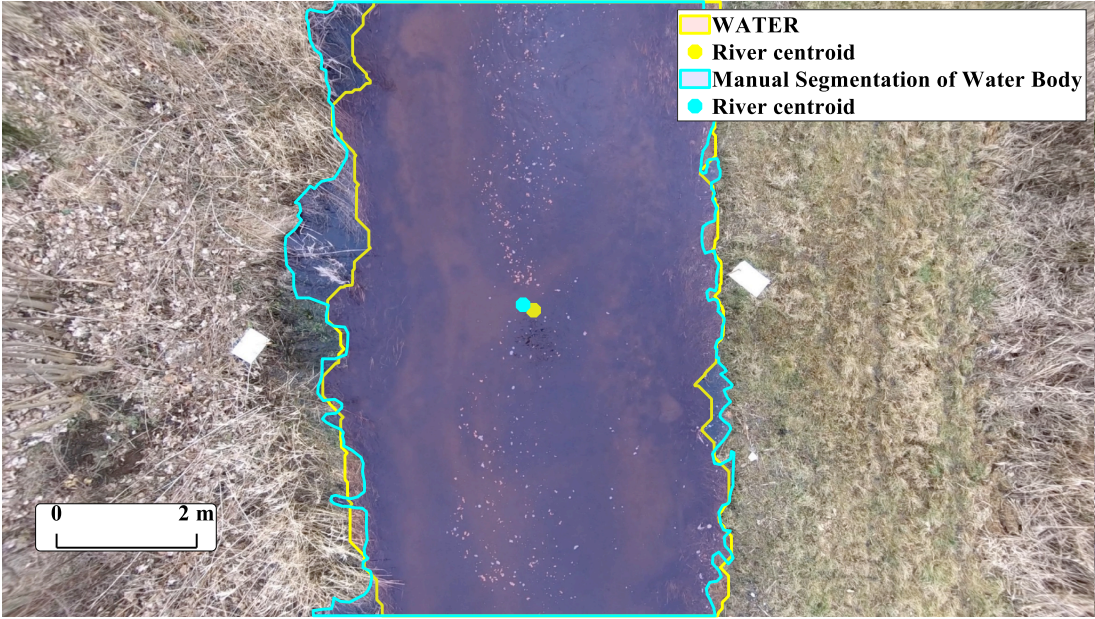



**ID: 17 - Stream Usserød Å ST9**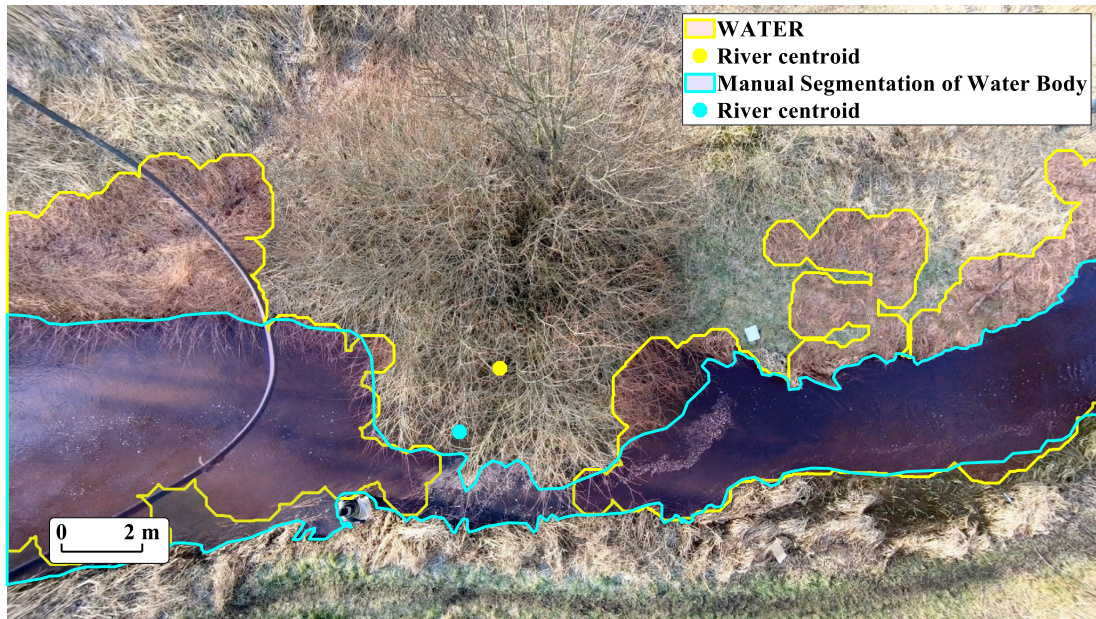**ID: 18 - Stream Usserød Å ST7**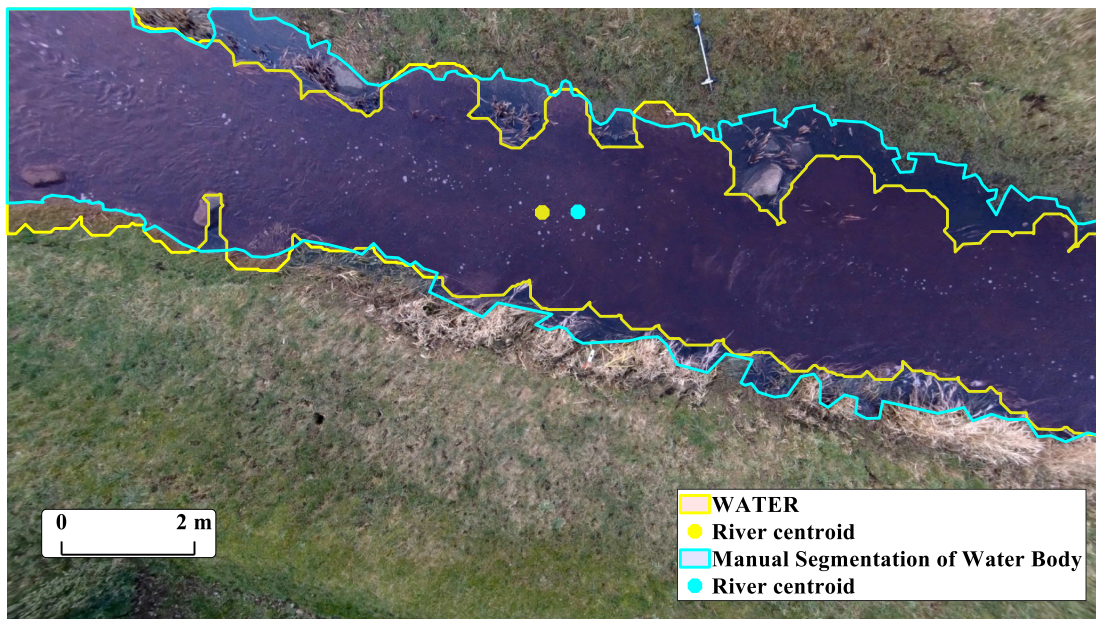



**ID: 19 - Stream Usserød Å ST8**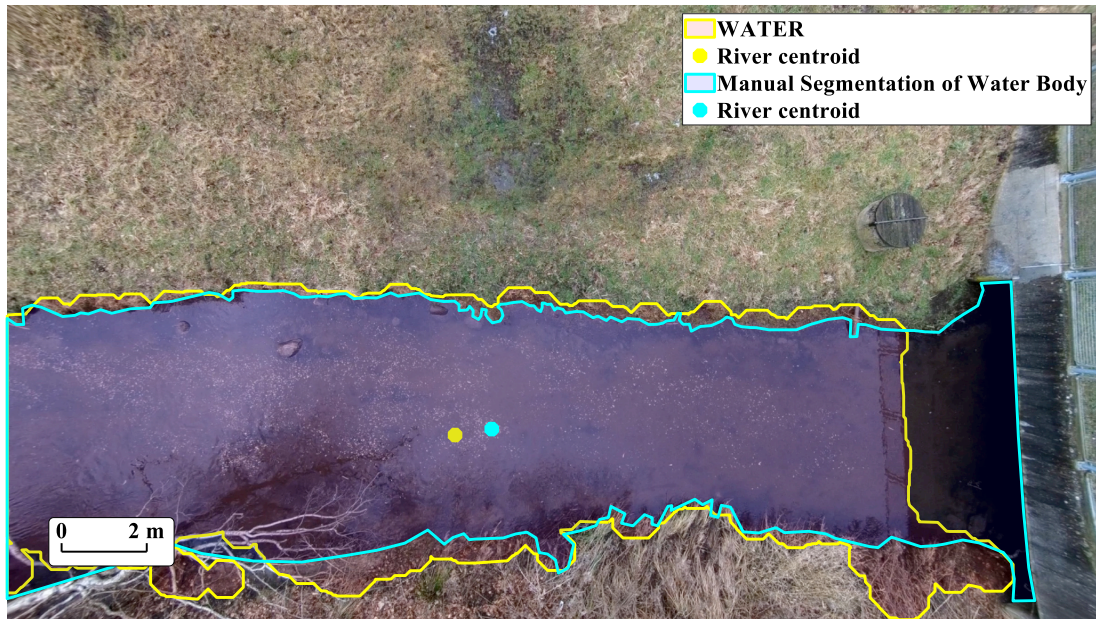**ID: 20 - Stream Vejle Å Ving. X S2**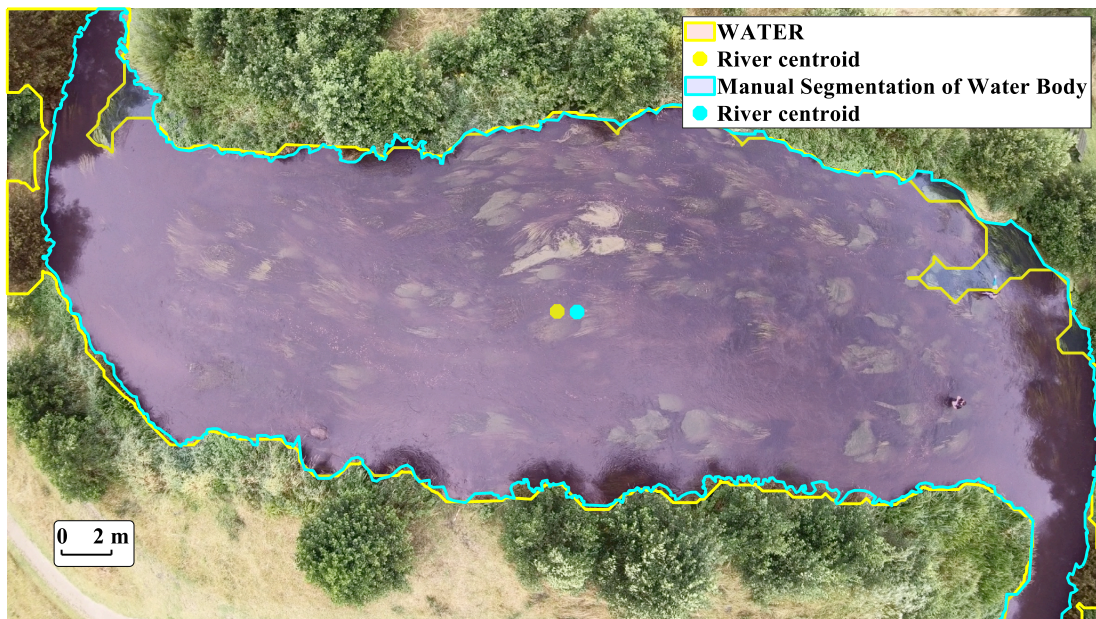



**ID: 21 - Stream Vejle Å Ving. X S1**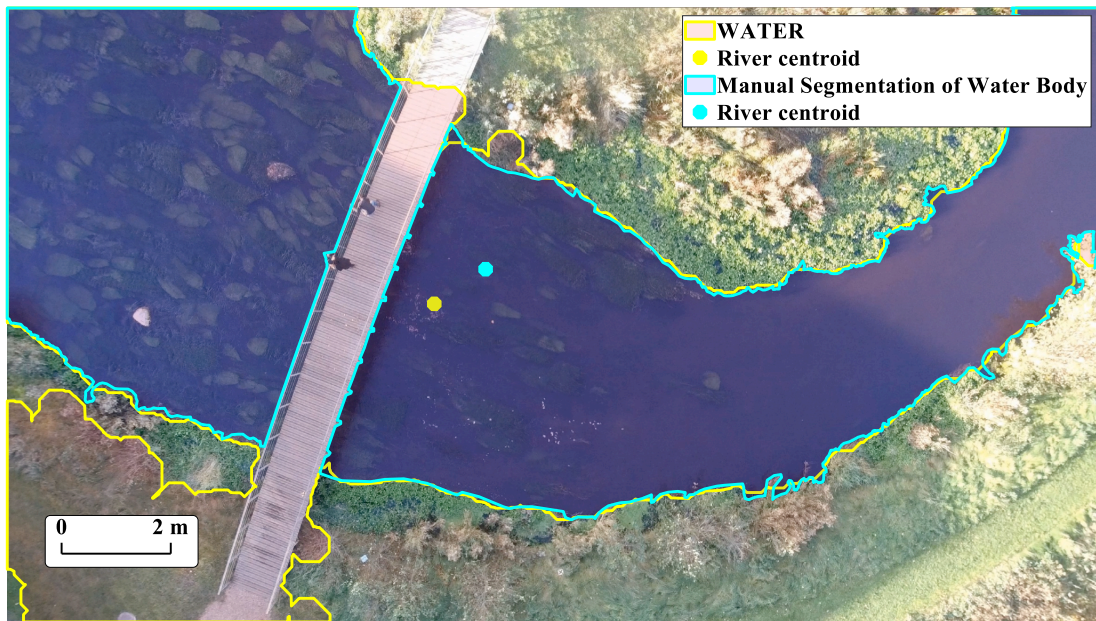**ID: 22 - Stream Vejle Å X S3**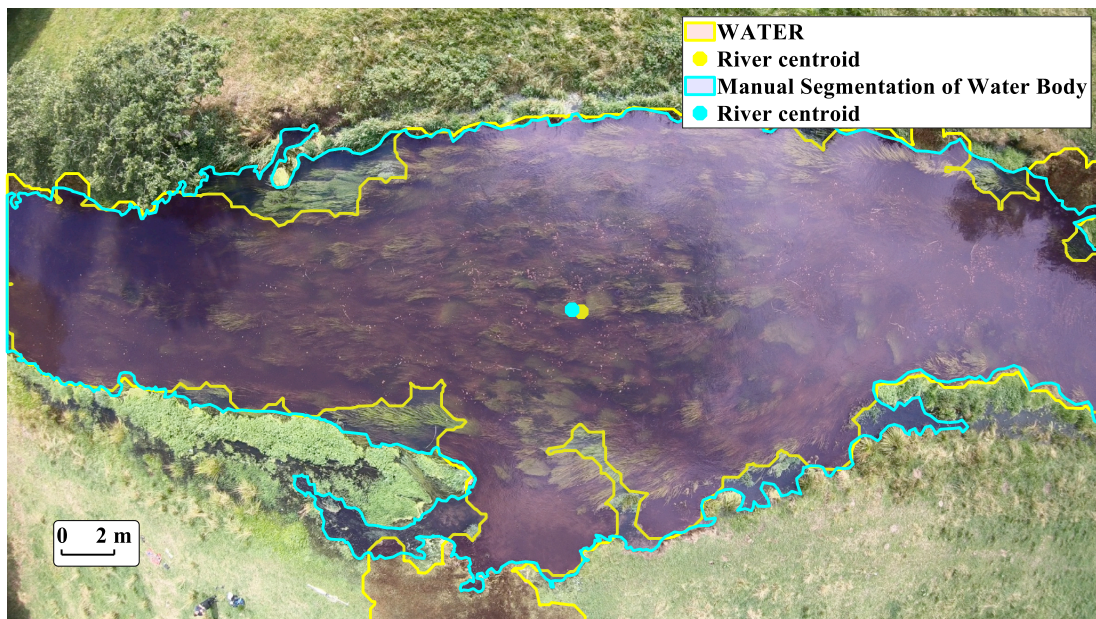



**ID: 23 - Stream Vejle Å X S1**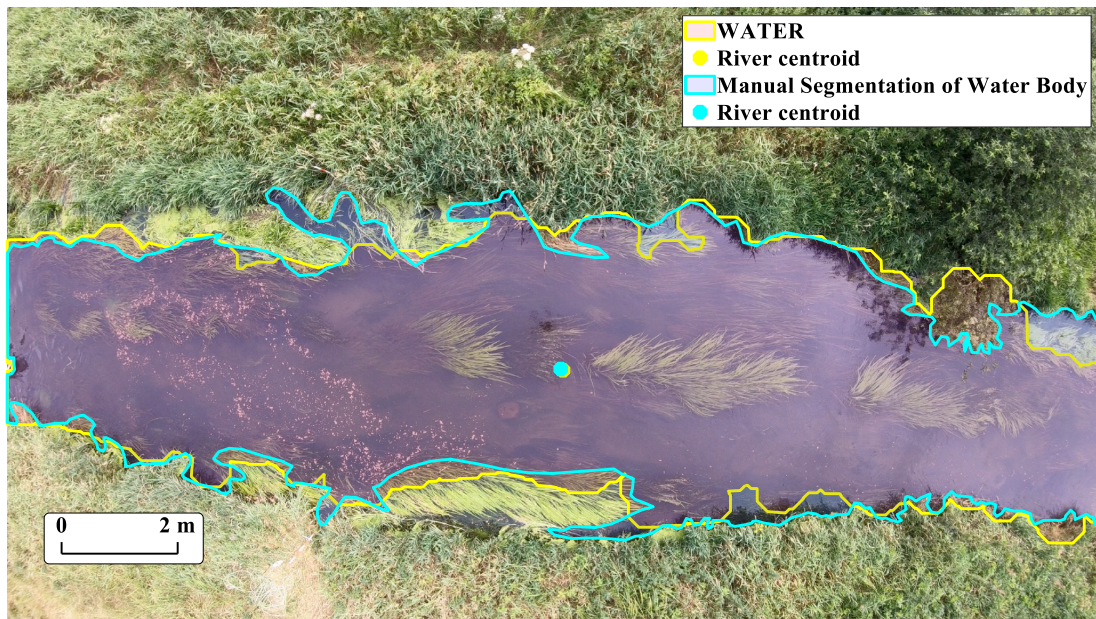**ID: 24 - Stream Vejle Å X S2**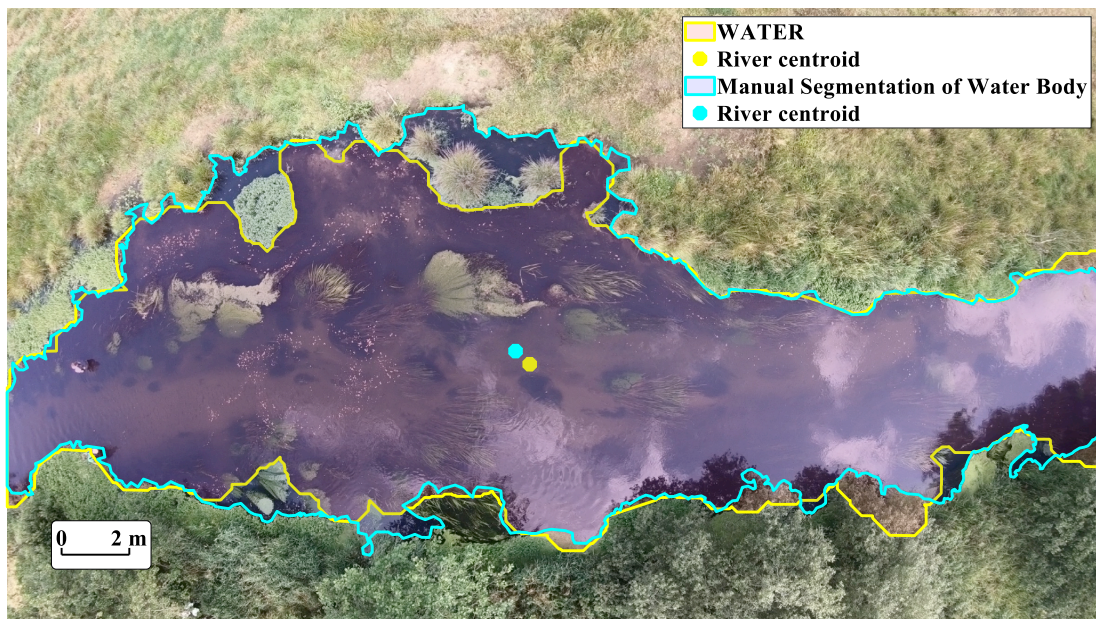



**ID: 25 - Stream Værebro Å Veksø bro**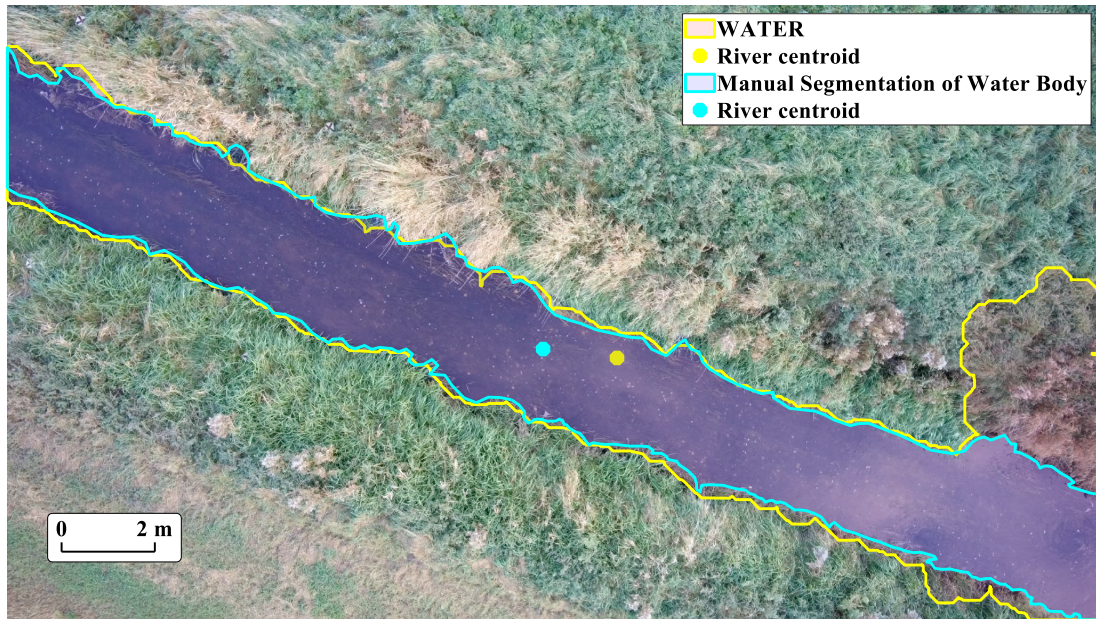**ID: 26 - Stream Amose Å XS1**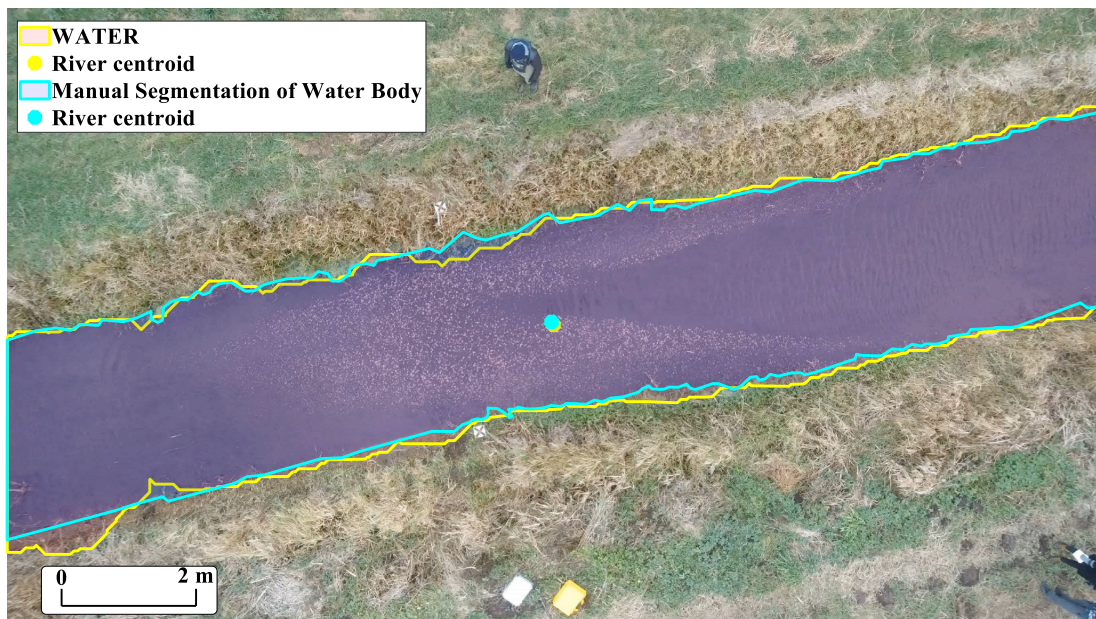

**ID: 27 - Stream Amose Å XS2**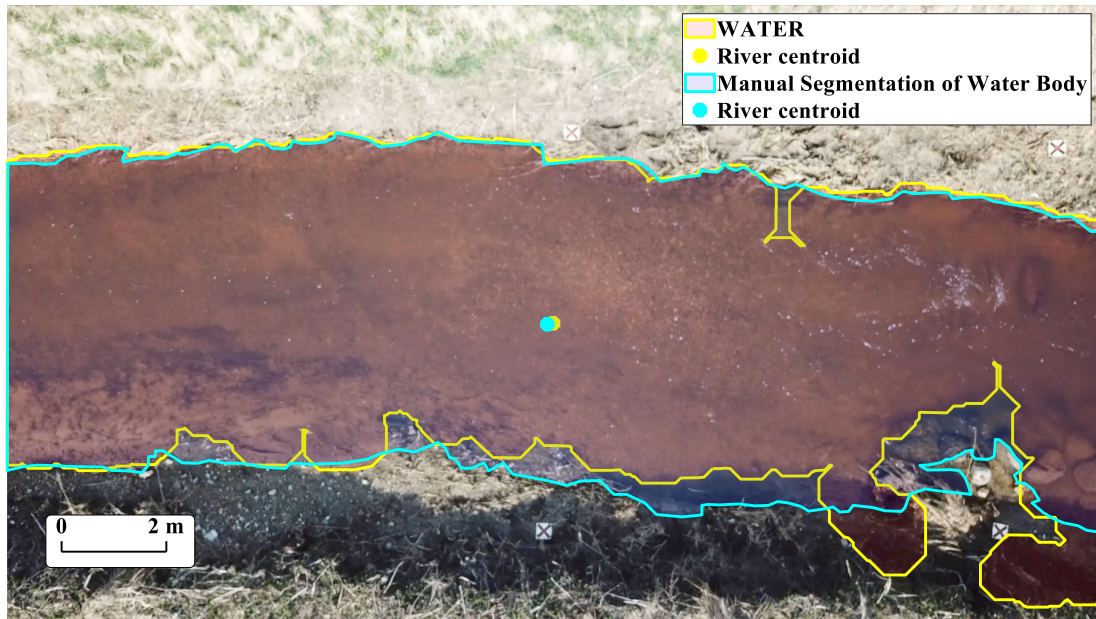

Supplement: s1 [file s1]
